# Supplementary material
Source: PubMed Central journal article supplement (PMC6923592)

Figure 1A  
Input (Left). IP (Right).

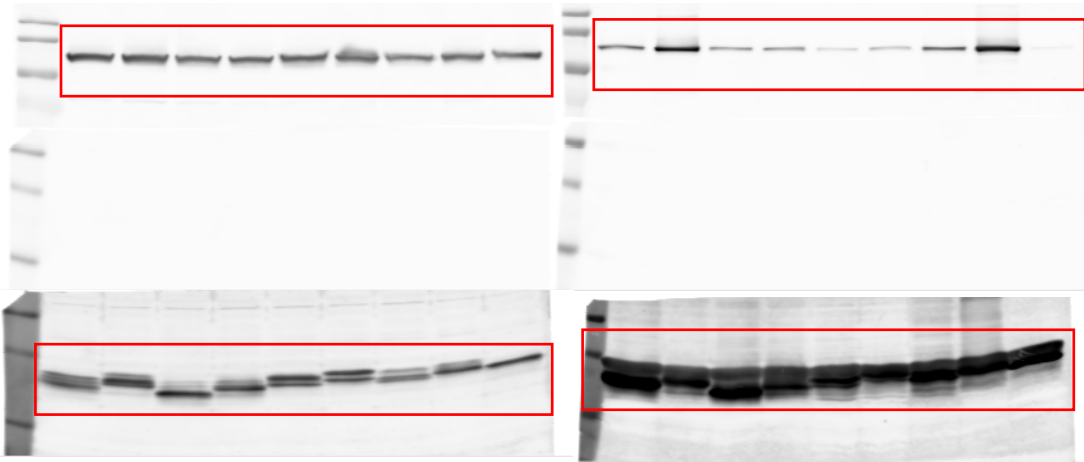

Figure 1B  
Input (Left). IP (Right).

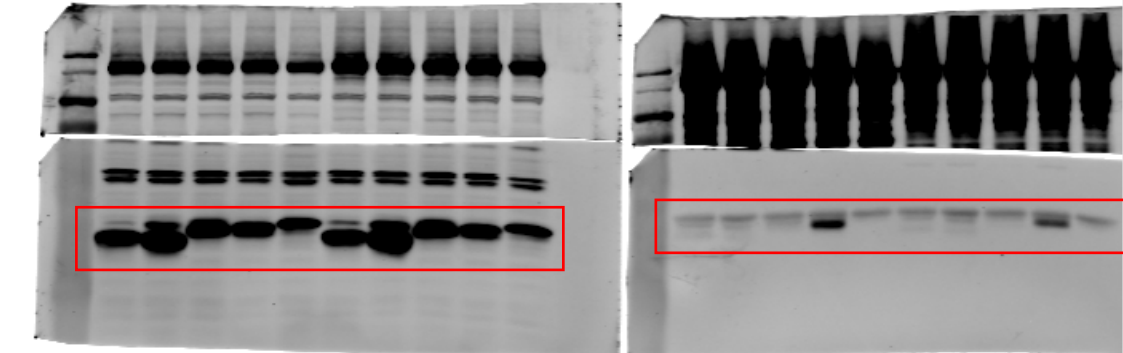

Different Exposure.

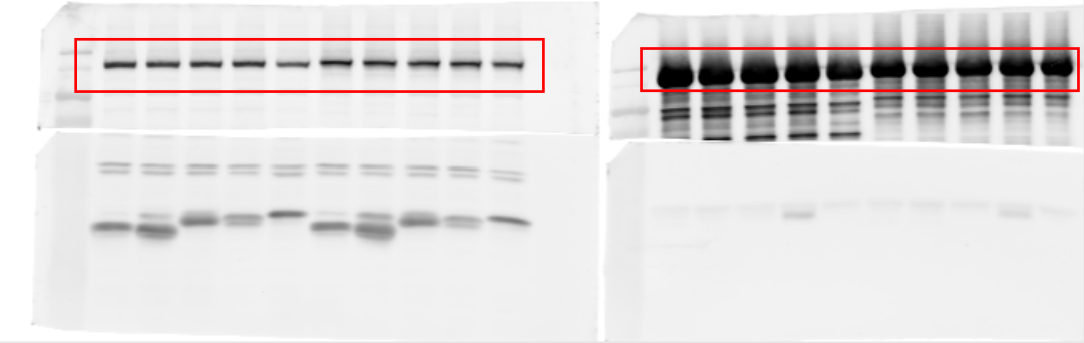

Figure 1C

Input-Anti-Pan RAS antibody, several volumes of lysate loaded (Left). IP (Right).

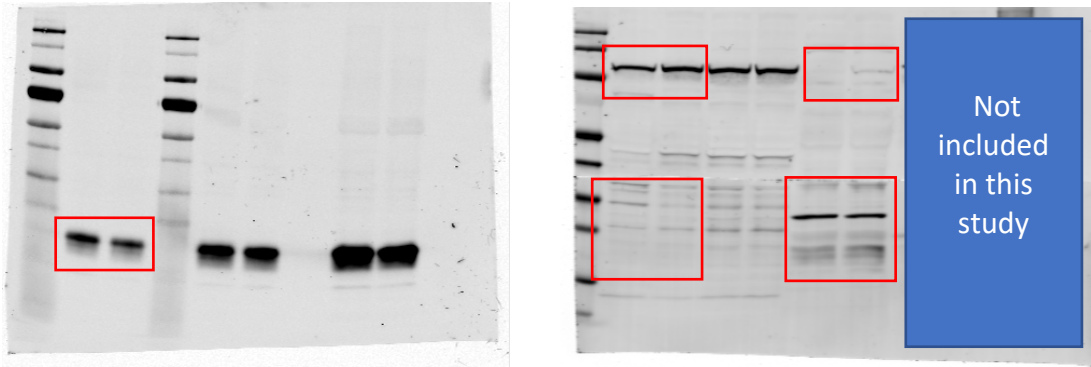

Figure 2A

Input (Left). IP (right).

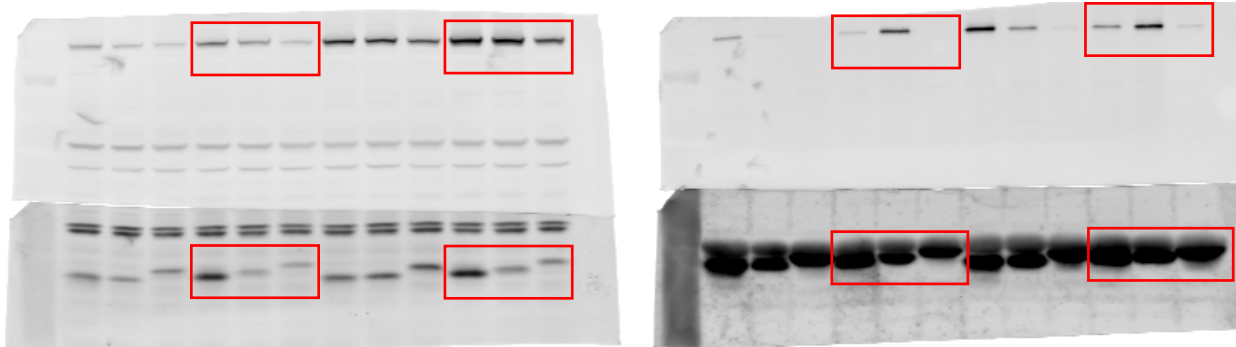

Figure 2B

Input (Left side). IP (Right side).

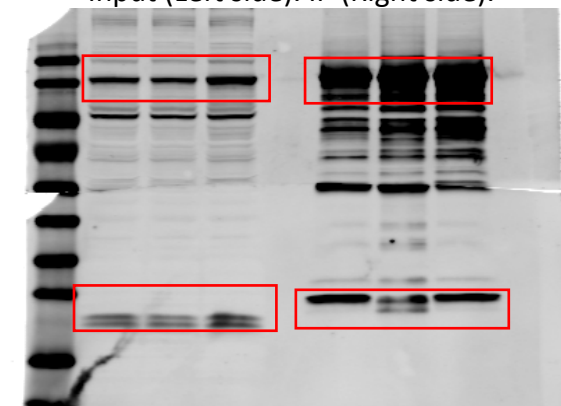

Figure 3A  
Coomassie for GST proteins (Left). Western Blot for pulldown (Right).

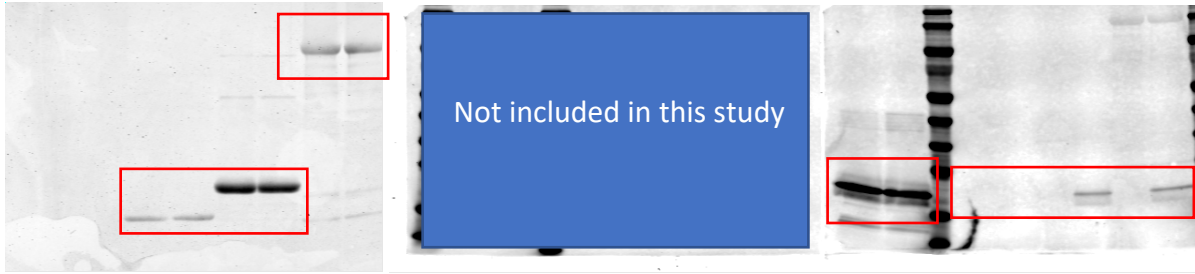

Figure 3B  
Coomassie for GST-proteins (Left). Blot KRAS4A pulldown (Right).

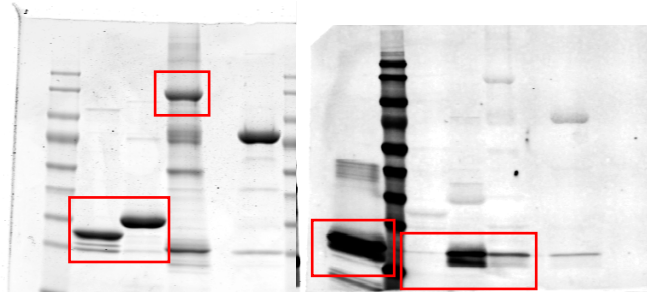

Blot KRAS4B pulldown (Left). Blot RAC2 pulldown (Right).

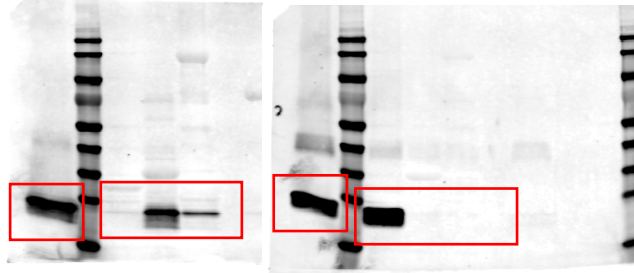

Figure 3C  
FLAG Input (Left). HA Input (Right).

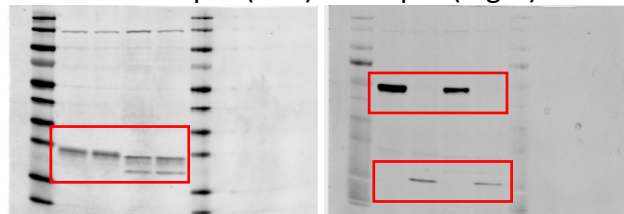

FLAG IP (Left). HA IP (Right).

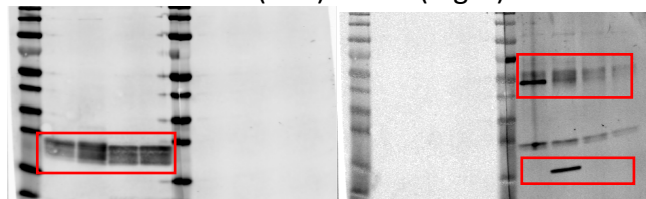

Figure 3D  
FLAG Input (Left). HA Input (Right).

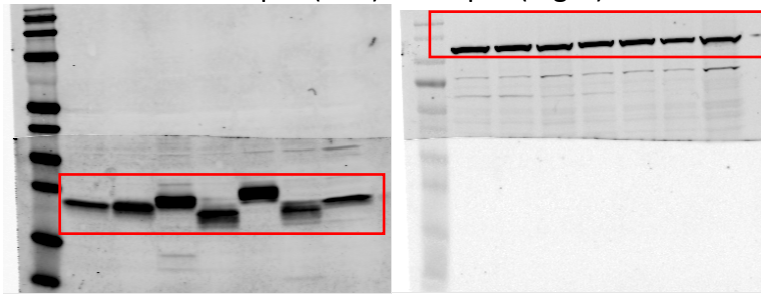

FLAG IP (Left). HA IP (Right).

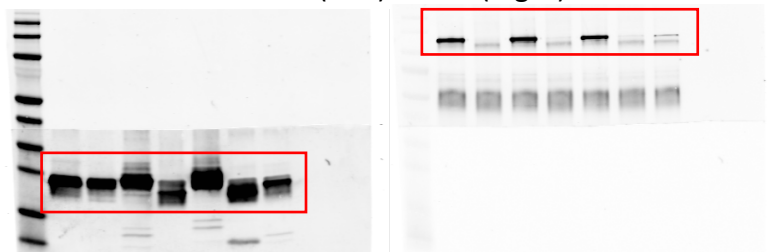

Figure 4D  
Endogenous HK1 (Top Left). FLAG input (Bottom Left).  
Endogenous HK2 (Top Right). RhoGDI (Bottom Right)-Run on the same gel as Endogenous HK2.

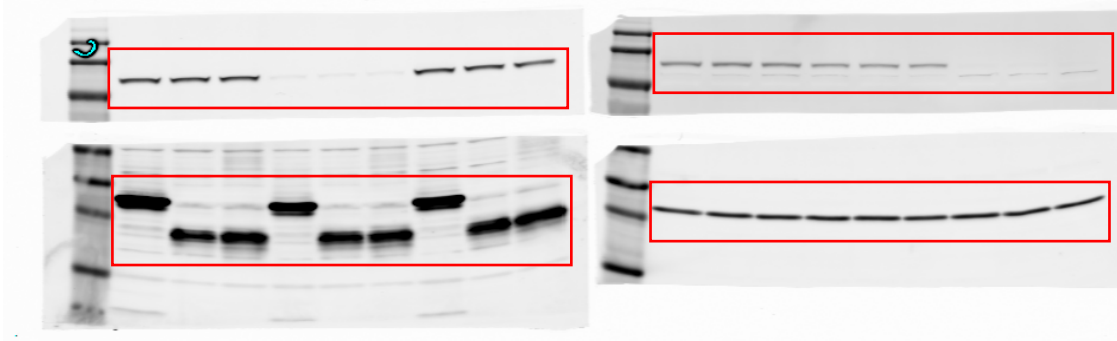

Figure 4E  
KRAS4B. KRAS4A.

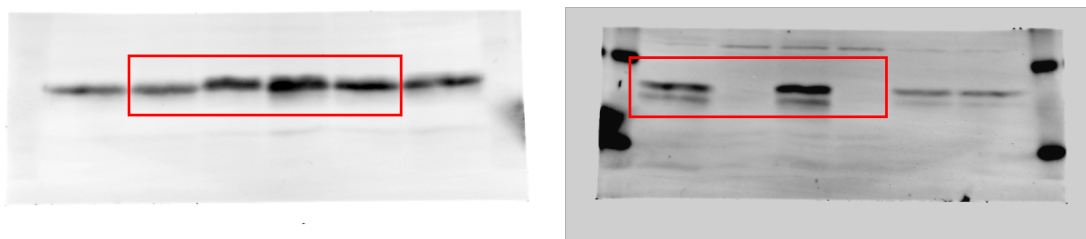

Extended Figure 1  
Input (Left). IP (Right).

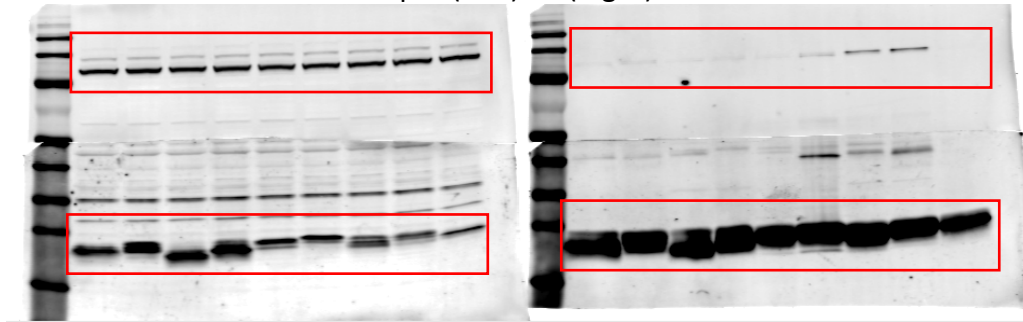

Extended Figure 2A  
HK1 Input and IP (Top). FLAG Input and IP (Bottom).

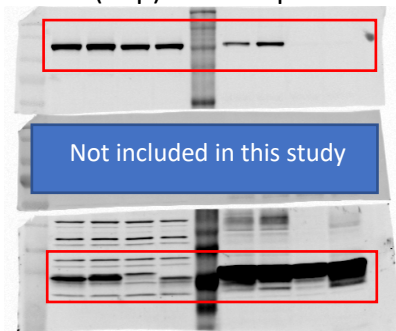

HK2 Input and IP (Top). FLAG Input and IP (Bottom).

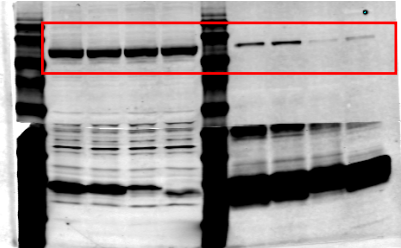

Extended Figure 2B  
GST-RBD pulldowns (Left). Input (Right).

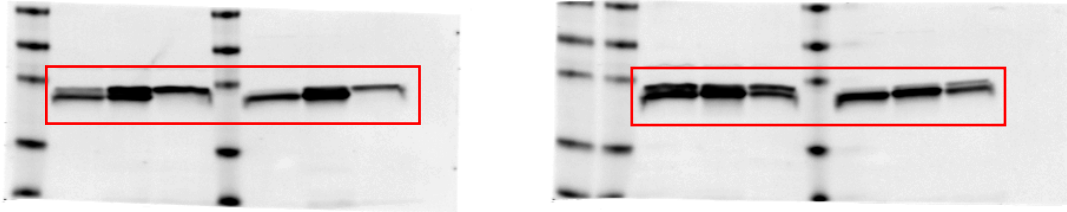

Extended Figure 3C.  
Blots cut into strips.  
HK1 (Left). F<sub>1</sub>-ATPases (Middle). SDHA (Right).

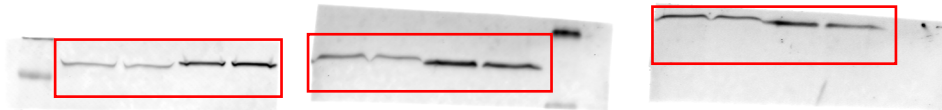

RhoGDI (Left) -Run on same gel. Fibrillarlin (Middle). EEA1 (Right).

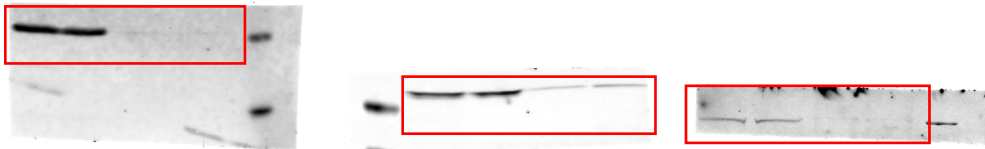

RAS (Left). KRAS4A (Right).

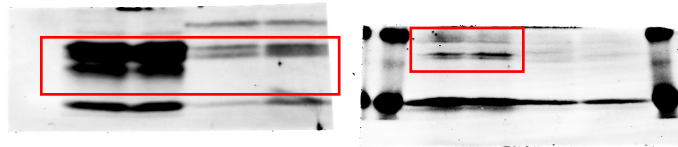

Extended Figure 3D  
FLAG input (Left). HK1 input (Right).

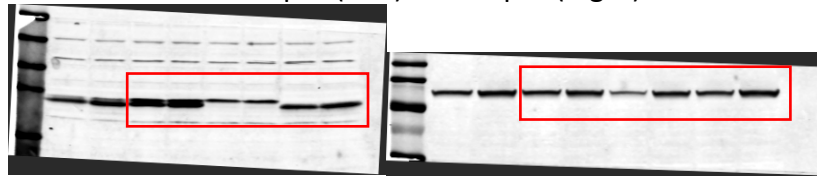

FLAG IP (Left). HA IP (Right).

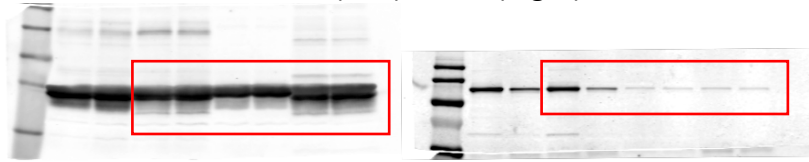

Extended Figure 6C  
HK1, pERK, RhoGDI-Run on same gel (Left). HK2, RhoGDI-Run on same gel (Right).

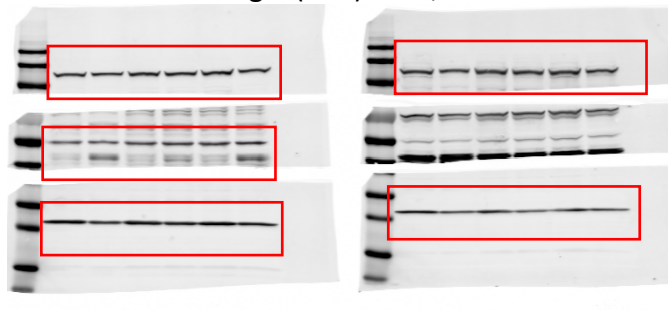

tMEK, FLAG.

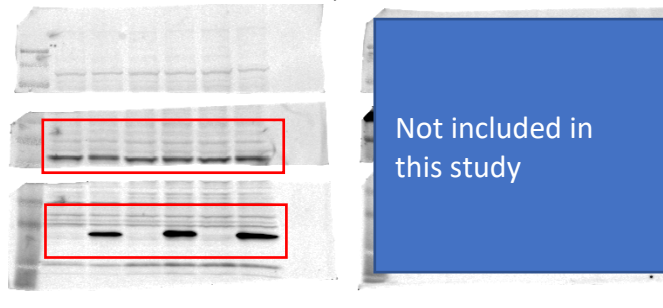

pMEK (Left). tERK (Right)

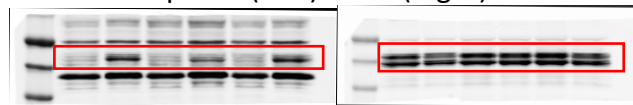

tAKT (Left). pAKT (Right).

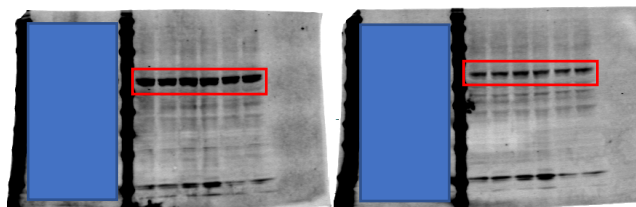

Extended Figure 6D  
tAKT (Left). pAKT (Right).

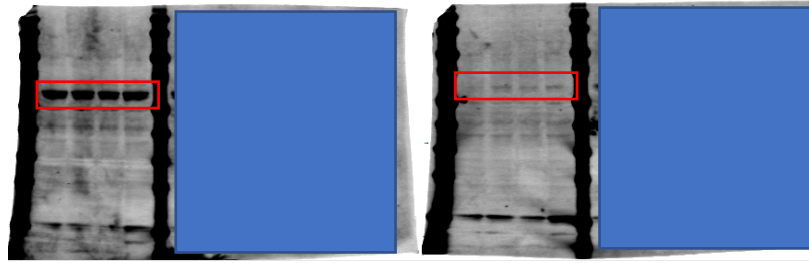

pERK (Left). tERK (Right).

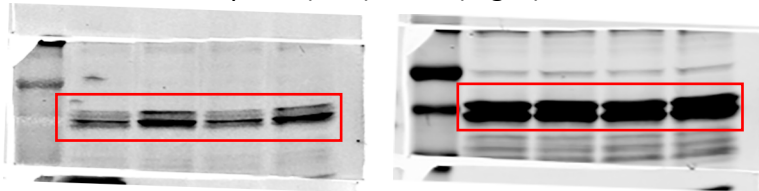

pMek (Left). tMEK (Right).

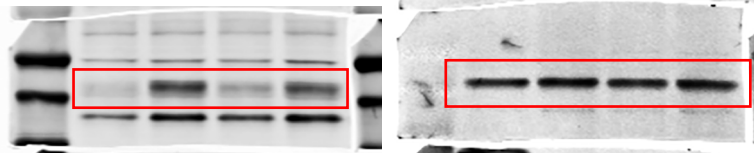

FLAG (Left). RhoGDI-Run on same gel (Right).

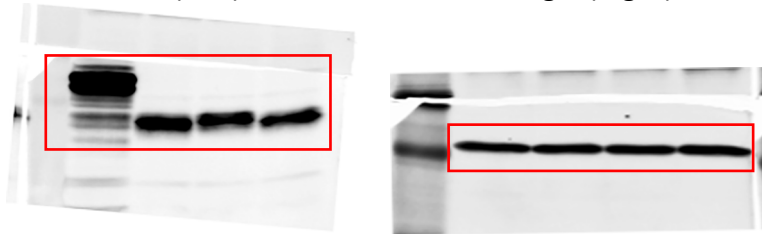



Extended Figure 7  
FLAG (Left). RhoGDI-Run on same gel (Right).

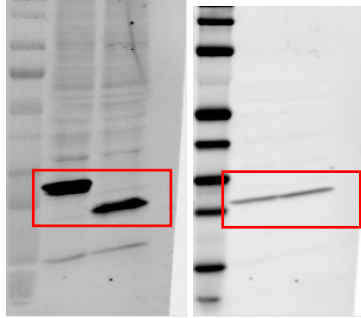

Extended Figure 9A  
HK1 standards (Left). Blot HK1 A549 and HTC-15 cells (Right).

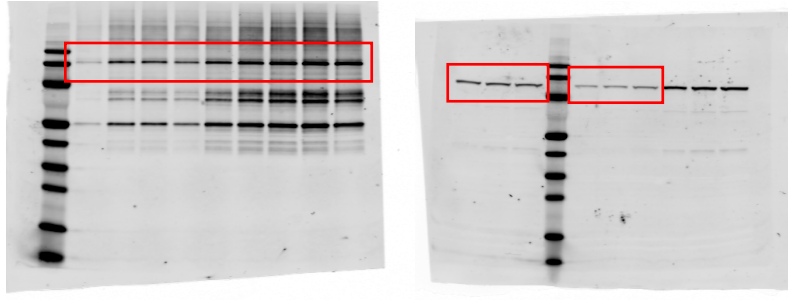

Extended Figure 9B  
KRAS Standard (Left). Blot KRAS A549 cells (Middle). KRAS in HTC-15 cells (Right).

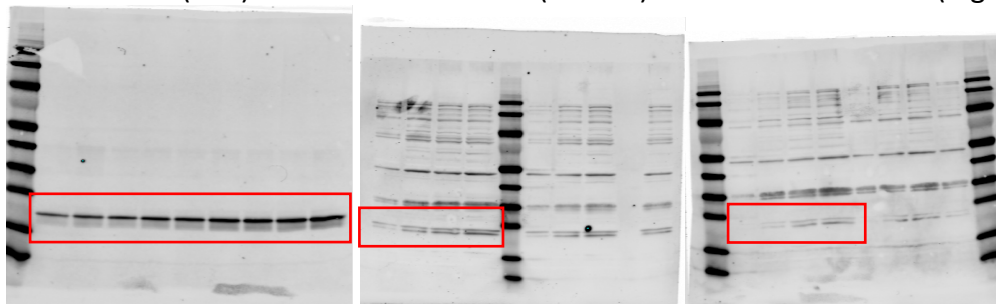

Supplement: NIHMS1541488-supplement-1.pdf [file NIHMS1541488-supplement-1.pdf]
